# Supplementary material for: An exothermic chip for point-of-care testing using a forehead thermometer as a readout
Source: Royal Society of Chemistry journal article supplement (doi:10.1039/c5lc01136a), 2015-12-14
Supplement: c5lc01136a1.pdf [file c5lc01136a1.pdf]

Supporting Information

Ms. No. LC-ART-09-2015-001136

November 27, 2015

**An Exothermic Chip for Point-of-Care Testing Using a Forehead  
Thermometer as Readout**

Bingbing Gao, Hong Liu,\* and Zhongze Gu\*

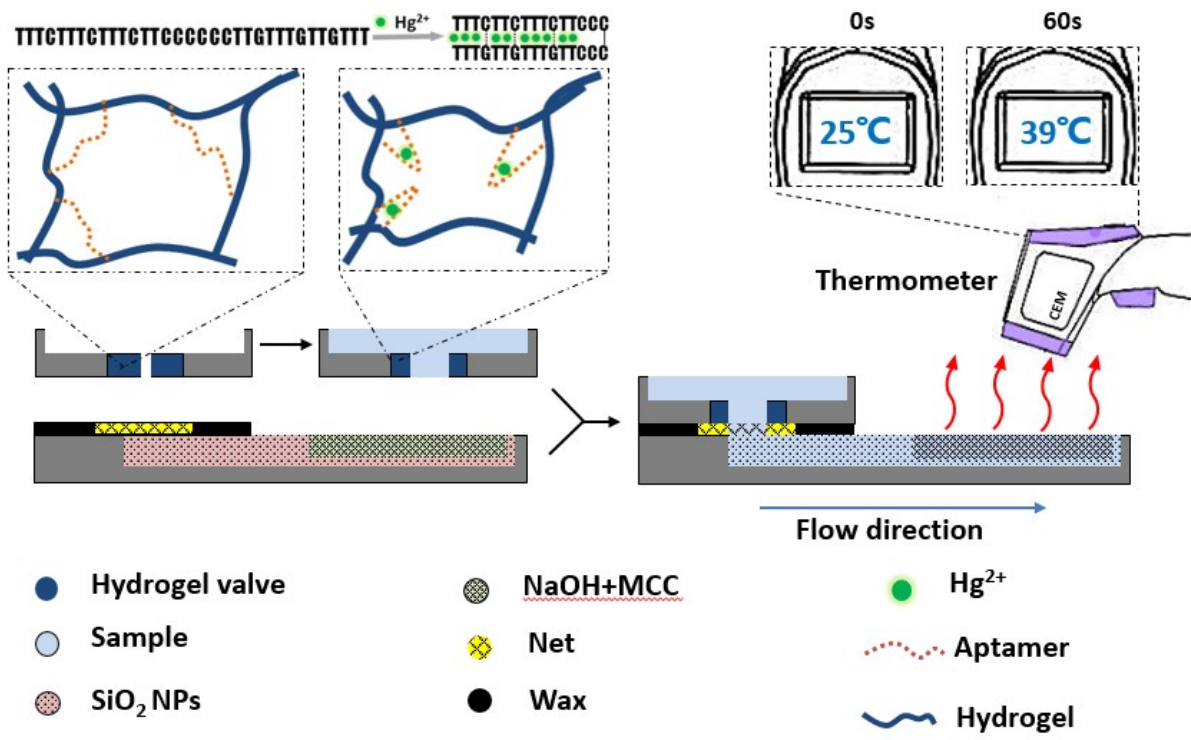

Figure S1. Schematic illustration of sampling part and euthermic part of the exothermic chip for Hg<sup>2+</sup> detection. MCC: microcrystalline cellulose.
